# Supplementary material for: Nuclear cGMP-Dependent Kinase Regulates Gene Expression via Activity-Dependent Recruitment of a Conserved Histone Deacetylase Complex
Source: PubMed Central journal article supplement (PMC3088716; doi:10.1371/journal.pgen.1002065), 2011-05-05

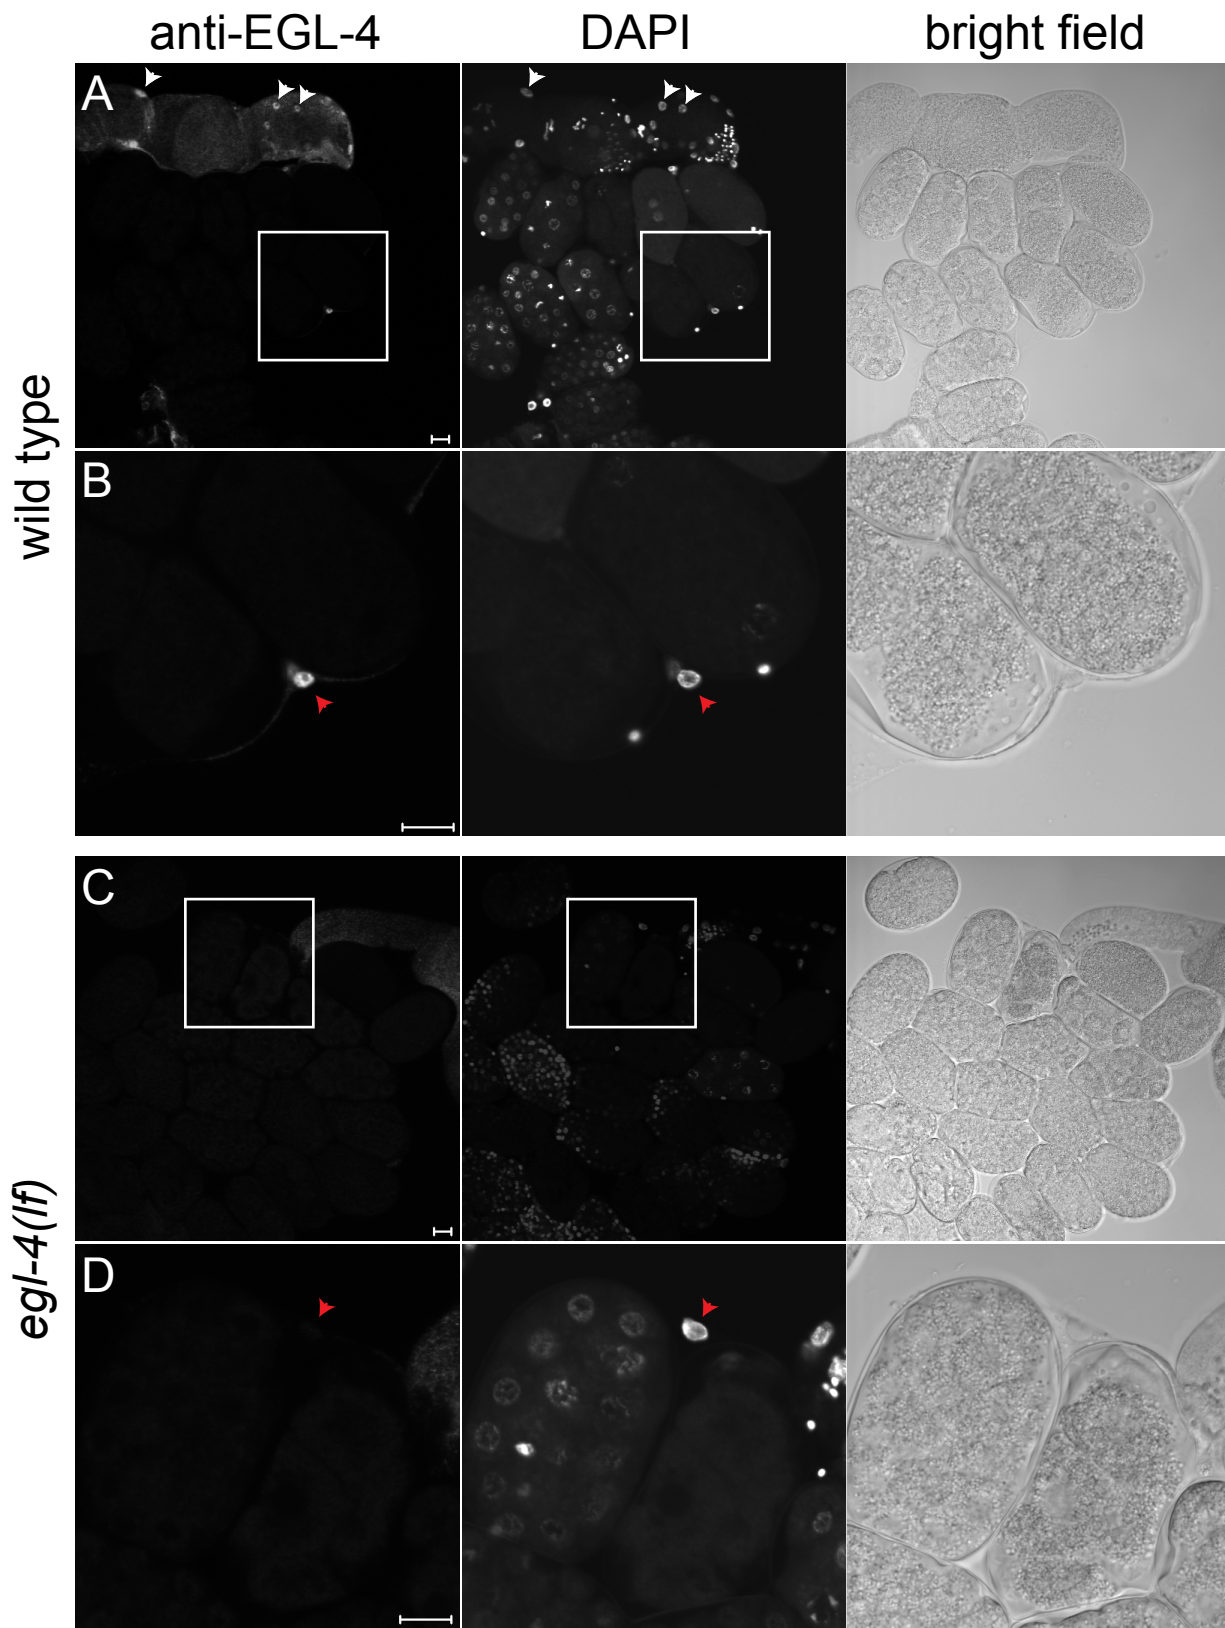

Supplement: pgen.1002065.s005.pdf [file pgen.1002065.s005.pdf]
